# Supplementary material
Source: PubMed Central journal article supplement (PMC1501086)
Supplement: NIHMS9856-supplement-supporting.pdf [file NIHMS9856-supplement-supporting.pdf]

## Supporting Information

Table S1. Complete Crystallographic Details for  $[\text{K}(222)][\text{Fe}(\text{TpivPP})(\text{NO}_3)] \cdot \text{C}_6\text{H}_5\text{Cl}$ .

Table S2. Atomic Coordinates and Equivalent Isotropic Displacement Parameters for  $[\text{K}(222)][\text{Fe}(\text{TpivPP})(\text{NO}_3)] \cdot \text{C}_6\text{H}_5\text{Cl}$ .

Table S3. Bond Lengths for  $[\text{K}(222)][\text{Fe}(\text{TpivPP})(\text{NO}_3)] \cdot \text{C}_6\text{H}_5\text{Cl}$ .

Table S4. Bond Angles for  $[\text{K}(222)][\text{Fe}(\text{TpivPP})(\text{NO}_3)] \cdot \text{C}_6\text{H}_5\text{Cl}$ .

Table S5. Anisotropic Displacement Parameters for  $[\text{K}(222)][\text{Fe}(\text{TpivPP})(\text{NO}_3)] \cdot \text{C}_6\text{H}_5\text{Cl}$ .

Table S6. Hydrogen Coordinates and Isotropic Displacement Parameters for  $[\text{K}(222)][\text{Fe}(\text{TpivPP})(\text{NO}_3)] \cdot \text{C}_6\text{H}_5\text{Cl}$ .

**S1.** Crystallographic details for  $[\text{K}(222)][\text{Fe}(\text{TpivPP})(\text{NO}_3)] \cdot \text{C}_6\text{H}_5\text{Cl}$ 

---

|                                                 |                                                              |
|-------------------------------------------------|--------------------------------------------------------------|
| formula                                         | $\text{FeKClO}_{13}\text{N}_{11}\text{C}_{88}\text{H}_{105}$ |
| FW                                              | 1655.28                                                      |
| $a$ , Å                                         | 17.888(5)                                                    |
| $b$ , Å                                         | 21.500(9)                                                    |
| $c$ , Å                                         | 22.514(11)                                                   |
| $\beta$ , deg                                   | 100.32(3)                                                    |
| $V$ , Å <sup>3</sup>                            | 8519                                                         |
| $Z$                                             | 4                                                            |
| space group                                     | $P2_1/n$                                                     |
| $D_c$ , g/cm <sup>3</sup>                       | 1.29                                                         |
| $\mu$ , mm <sup>-1</sup>                        | 0.321                                                        |
| crystal dimens, mm                              | $0.81 \times 0.53 \times 0.21$                               |
| absorption correction                           | none                                                         |
| $\lambda$ , Å                                   | 0.71073                                                      |
| $T$ , K                                         | 118 K                                                        |
| diffractometer                                  | Enraf-Nonius CAD-4                                           |
| total data colld                                | 19627                                                        |
| unique data                                     | 19485                                                        |
| unique obsd data [ $F_o > 3 \sigma(\text{F})$ ] | 10231                                                        |
| refinement method                               | full-matrix on F                                             |
| variables                                       | 514                                                          |
| obs. data/variable                              | 20.1                                                         |
| GOF                                             | 1.88                                                         |
| final $R$ indices [ $I > 2 \sigma(\text{I})$ ]  | $R_1 = 0.074$ , $wR_2 = 0.093$                               |

---

**Table S2. Fractional Coordinates of  
[K(222)][Fe(NO<sub>3</sub>)TpiVPP]·C<sub>6</sub>H<sub>5</sub>Cl**

| atom  | x           | y            | z           |
|-------|-------------|--------------|-------------|
| Fe    | 0.45742(4)  | 0.07511(3)   | 0.77636(3)  |
| O(11) | 0.49325(22) | 0.06542(17)  | 0.69441(17) |
| N(11) | 0.50657(25) | 0.01162(21)  | 0.67398(20) |
| O(12) | 0.49213(26) | -0.03490(18) | 0.70163(20) |
| O(13) | 0.53209(26) | 0.00876(20)  | 0.62672(18) |
| O(1)  | 0.14756(27) | -0.05319(22) | 0.55803(27) |
| O(2)  | 0.51154(26) | 0.30431(20)  | 0.55860(20) |
| O(3)  | 0.88866(22) | 0.08413(23)  | 0.81930(20) |
| O(4)  | 0.60788(26) | -0.25289(19) | 0.76686(22) |
| N(1)  | 0.37385(21) | 0.00924(17)  | 0.77477(17) |
| N(2)  | 0.37180(21) | 0.14065(17)  | 0.74919(17) |
| N(3)  | 0.52488(21) | 0.15033(17)  | 0.80931(18) |
| N(4)  | 0.52906(22) | 0.01970(17)  | 0.83585(18) |
| N(5)  | 0.20637(25) | 0.02616(20)  | 0.61170(19) |
| N(6)  | 0.4897(3)   | 0.26172(21)  | 0.64426(24) |
| N(7)  | 0.76632(23) | 0.08640(20)  | 0.83334(20) |
| N(8)  | 0.52844(24) | -0.17068(18) | 0.76026(19) |
| C(a1) | 0.29839(27) | 0.01438(21)  | 0.75026(20) |
| C(a2) | 0.38530(28) | -0.05192(21) | 0.79024(22) |
| C(a3) | 0.29606(29) | 0.12810(22)  | 0.72839(22) |
| C(a4) | 0.38105(28) | 0.20247(21)  | 0.73743(22) |
| C(a5) | 0.51623(28) | 0.21126(22)  | 0.78989(23) |
| C(a6) | 0.59527(28) | 0.14836(22)  | 0.84610(23) |
| C(a7) | 0.59866(28) | 0.03548(22)  | 0.87066(22) |
| C(a8) | 0.52129(26) | -0.04220(20) | 0.84501(21) |
| C(b1) | 0.26198(27) | -0.04551(22) | 0.74949(22) |
| C(b2) | 0.31598(26) | -0.08667(21) | 0.77299(22) |
| C(b3) | 0.25822(28) | 0.18363(23)  | 0.70202(24) |
| C(b4) | 0.31150(29) | 0.22888(22)  | 0.70701(24) |

**Table S2. - continued**

|       |             |              |             |
|-------|-------------|--------------|-------------|
| C(b5) | 0.58199(27) | 0.24716(21)  | 0.81273(25) |
| C(b6) | 0.6309(3)   | 0.20928(23)  | 0.84836(26) |
| C(b7) | 0.63508(28) | -0.01936(23) | 0.90070(24) |
| C(b8) | 0.58608(28) | -0.06731(22) | 0.88358(24) |
| C(m1) | 0.26067(28) | 0.07048(21)  | 0.72908(21) |
| C(m2) | 0.45019(27) | 0.23534(21)  | 0.75492(24) |
| C(m3) | 0.62927(28) | 0.09607(21)  | 0.87619(22) |
| C(m4) | 0.45454(25) | -0.07653(21) | 0.82186(21) |
| C(1)  | 0.17722(27) | 0.06649(20)  | 0.70471(23) |
| C(2)  | 0.15146(29) | 0.04334(23)  | 0.64674(24) |
| C(3)  | 0.0737(3)   | 0.03913(24)  | 0.62414(25) |
| C(4)  | 0.02227(29) | 0.05765(24)  | 0.65994(28) |
| C(5)  | 0.04673(29) | 0.08109(23)  | 0.71691(26) |
| C(6)  | 0.12384(29) | 0.08525(21)  | 0.73913(24) |
| C(7)  | 0.2040(4)   | -0.02146(26) | 0.57226(29) |
| C(8)  | 0.2780(4)   | -0.03458(26) | 0.54961(27) |
| C(9)  | 0.3335(4)   | 0.0197(3)    | 0.5557(4)   |
| C(10) | 0.3169(4)   | -0.0890(3)   | 0.5869(3)   |
| C(11) | 0.2573(5)   | -0.0532(4)   | 0.4833(3)   |
| C(12) | 0.45258(28) | 0.30093(23)  | 0.73367(25) |
| C(13) | 0.4719(3)   | 0.31309(25)  | 0.67731(28) |
| C(14) | 0.4775(3)   | 0.37471(27)  | 0.6589(3)   |
| C(15) | 0.4630(3)   | 0.42270(25)  | 0.6951(3)   |
| C(16) | 0.4439(3)   | 0.41151(24)  | 0.7510(3)   |
| C(17) | 0.43770(29) | 0.35051(24)  | 0.76942(26) |
| C(18) | 0.5098(3)   | 0.25866(27)  | 0.58953(27) |
| C(19) | 0.5288(3)   | 0.19371(27)  | 0.56916(25) |
| C(20) | 0.5893(3)   | 0.16258(27)  | 0.61687(27) |
| C(21) | 0.5580(4)   | 0.1991(3)    | 0.51069(28) |
| C(22) | 0.4560(4)   | 0.1541(3)    | 0.5591(3)   |

**Table S2. - continued**

|       |             |              |              |
|-------|-------------|--------------|--------------|
| C(23) | 0.70436(28) | 0.10792(22)  | 0.91710(24)  |
| C(24) | 0.77254(29) | 0.10562(23)  | 0.89362(25)  |
| C(25) | 0.8398(3)   | 0.12571(26)  | 0.92985(28)  |
| C(26) | 0.8398(3)   | 0.14720(26)  | 0.98681(28)  |
| C(27) | 0.7735(4)   | 0.14939(26)  | 1.01002(26)  |
| C(28) | 0.7067(3)   | 0.12934(24)  | 0.97497(25)  |
| C(29) | 0.8213(3)   | 0.07783(25)  | 0.79970(27)  |
| C(30) | 0.7935(3)   | 0.06061(24)  | 0.73374(26)  |
| C(31) | 0.8352(4)   | 0.00156(29)  | 0.7210(3)    |
| C(32) | 0.8155(4)   | 0.11393(29)  | 0.6953(3)    |
| C(33) | 0.7073(3)   | 0.05000(27)  | 0.71709(27)  |
| C(34) | 0.45251(26) | -0.14428(21) | 0.83597(22)  |
| C(35) | 0.48649(26) | -0.18959(21) | 0.80511(22)  |
| C(36) | 0.47670(29) | -0.25256(21) | 0.81690(23)  |
| C(37) | 0.43524(29) | -0.27032(22) | 0.85985(25)  |
| C(38) | 0.40243(28) | -0.22589(24) | 0.89174(24)  |
| C(39) | 0.41188(27) | -0.16399(22) | 0.87977(22)  |
| C(40) | 0.5873(3)   | -0.20315(24) | 0.74326(26)  |
| C(41) | 0.6248(3)   | -0.17480(25) | 0.69412(27)  |
| C(42) | 0.6874(5)   | -0.2194(3)   | 0.6830(4)    |
| C(43) | 0.6610(4)   | -0.11268(29) | 0.7160(3)    |
| C(44) | 0.5669(4)   | -0.1652(3)   | 0.63683(28)  |
| K     | 0.74705(6)  | -0.15046(5)  | 0.04080(5)   |
| O(5)  | 0.73298(19) | -0.02124(16) | 0.05656(15)  |
| O(6)  | 0.61006(20) | -0.10208(17) | 0.06484(17)  |
| O(7)  | 0.68094(20) | -0.21048(17) | -0.06833(17) |
| O(8)  | 0.81228(20) | -0.13705(19) | -0.06187(16) |
| O(9)  | 0.88372(18) | -0.17167(15) | 0.12390(16)  |
| O(10) | 0.76108(20) | -0.25624(16) | 0.11597(16)  |

**Table S2. - Continued**

|       |             |              |              |
|-------|-------------|--------------|--------------|
| N(9)  | 0.88480(23) | -0.06552(19) | 0.04132(19)  |
| N(10) | 0.61126(26) | -0.23488(21) | 0.04018(21)  |
| C(45) | 0.8599(3)   | -0.00078(23) | 0.04563(24)  |
| C(46) | 0.8022(3)   | 0.00682(23)  | 0.08600(23)  |
| C(47) | 0.6729(3)   | -0.00585(25) | 0.08683(25)  |
| C(48) | 0.6022(3)   | -0.03667(26) | 0.05731(25)  |
| C(49) | 0.5426(3)   | -0.13508(28) | 0.04467(27)  |
| C(50) | 0.5528(3)   | -0.2011(3)   | 0.06532(29)  |
| C(51) | 0.5819(3)   | -0.25278(26) | -0.02246(28) |
| C(52) | 0.6436(3)   | -0.26702(25) | -0.05797(27) |
| C(53) | 0.7351(3)   | -0.2202(3)   | -0.10627(27) |
| C(54) | 0.7707(3)   | -0.1601(3)   | -0.11754(25) |
| C(55) | 0.8542(3)   | -0.08253(28) | -0.06940(25) |
| C(56) | 0.9148(3)   | -0.07455(26) | -0.01417(26) |
| C(57) | 0.94298(29) | -0.08039(24) | 0.09430(25)  |
| C(58) | 0.95099(28) | -0.14931(24) | 0.10585(25)  |
| C(59) | 0.8915(3)   | -0.23415(23) | 0.14515(25)  |
| C(60) | 0.8214(3)   | -0.25358(25) | 0.16626(24)  |
| C(61) | 0.6923(3)   | -0.27684(28) | 0.13299(26)  |
| C(62) | 0.6348(3)   | -0.28979(28) | 0.07688(29)  |
| Cl    | 0.23957(15) | 0.17970(12)  | -0.45298(20) |
| C(63) | 0.1747(5)   | 0.1470(3)    | 0.4874(4)    |
| C(64) | 0.1059(4)   | 0.1302(3)    | 0.5014(4)    |
| C(65) | 0.0511(8)   | 0.1007(5)    | 0.4581(6)    |
| C(66) | 0.0655(13)  | 0.0947(6)    | 0.4029(10)   |
| C(67) | 0.1408(16)  | 0.1126(7)    | 0.3919(5)    |
| C(68) | 0.1989(10)  | 0.1410(6)    | 0.4375(7)    |

Table S3. Bond Distance in [K(222)] [Fe(NO<sub>3</sub>)TpivPP] · C<sub>6</sub>H<sub>5</sub>Cl <sup>a</sup>

| type        | length , Å | type        | length , Å |
|-------------|------------|-------------|------------|
| Fe-N(1)     | 2.055(4)   | C(23)-C(28) | 1.375(7)   |
| Fe-N(2)     | 2.091(4)   | C(24)-N(7)  | 1.404(7)   |
| Fe-N(3)     | 2.074(4)   | C(24)-C(25) | 1.395(7)   |
| Fe-N(4)     | 2.059(4)   | C(25)-C(26) | 1.363(9)   |
| Fe-O11      | 2.069(4)   | C(26)-C(27) | 1.380(9)   |
| O(11)-N(11) | 1.283(6)   | C(27)-C(28) | 1.377(8)   |
| N(11)-O(12) | 1.230(6)   | C(29)-N(7)  | 1.357(7)   |
| N(11)-O(13) | 1.232(6)   | C(29)-O(3)  | 1.214(6)   |
| N(1)-C(a1)  | 1.368(6)   | C(29)-C(30) | 1.525(8)   |
| N(1)-C(a2)  | 1.366(6)   | C(30)-C(31) | 1.525(8)   |
| N(2)-C(a3)  | 1.379(6)   | C(30)-C(32) | 1.529(8)   |
| N(2)-C(a4)  | 1.371(6)   | C(30)-C(33) | 1.537(8)   |
| N(3)-C(a5)  | 1.381(6)   | C(34)-C(35) | 1.397(6)   |
| N(3)-C(a6)  | 1.378(6)   | C(34)-C(39) | 1.392(7)   |
| N(4)-C(a7)  | 1.389(6)   | C(35)-N(8)  | 1.421(6)   |
| N(4)-C(a8)  | 1.358(6)   | C(35)-C(36) | 1.397(6)   |
| C(a1)-C(b1) | 1.442(6)   | C(36)-C(37) | 1.374(7)   |
| C(a1)-C(m1) | 1.422(6)   | C(37)-C(38) | 1.387(7)   |
| C(a2)-C(b2) | 1.440(7)   | C(38)-C(39) | 1.374(7)   |
| C(a2)-C(m4) | 1.416(7)   | C(40)-N(8)  | 1.373(6)   |
| C(a3)-C(b3) | 1.446(7)   | C(40)-O(4)  | 1.222(6)   |
| C(a3)-C(m1) | 1.393(7)   | C(40)-C(41) | 1.521(8)   |
| C(a4)-C(b4) | 1.426(7)   | C(41)-C(42) | 1.528(8)   |
| C(a4)-C(m2) | 1.418(7)   | C(41)-C(43) | 1.527(8)   |
| C(a5)-C(b5) | 1.424(7)   | C(41)-C(44) | 1.517(9)   |
| C(a5)-C(m2) | 1.397(7)   | K-O(5)      | 2.818(4)   |
| C(a6)-C(b6) | 1.454(7)   | K-O(6)      | 2.803(4)   |
| C(a6)-C(m3) | 1.395(7)   | K-O(7)      | 2.839(4)   |
| C(a7)-C(b7) | 1.454(7)   | K-O(8)      | 2.785(4)   |
| C(a7)-C(m3) | 1.410(7)   | K-O(9)      | 2.837(4)   |
| C(a8)-C(b8) | 1.424(7)   | K-O(10)     | 2.819(4)   |
| C(a8)-C(m4) | 1.421(7)   | K-N(9)      | 3.065(4)   |
| C(b1)-C(b2) | 1.346(7)   | K-N(10)     | 3.030(5)   |
| C(b3)-C(b4) | 1.352(7)   | C(45)-N(9)  | 1.470(6)   |
| C(b5)-C(b6) | 1.349(7)   | C(45)-C(46) | 1.502(7)   |

Table S3.- continued

|             |          |             |           |
|-------------|----------|-------------|-----------|
| C(b7)-C(b8) | 1.363(7) | C(46)-O(5)  | 1.429(6)  |
| C(m1)-C(1)  | 1.498(5) | O(5)-C(47)  | 1.411(6)  |
| C(m2)-C(12) | 1.492(5) | C(47)-C(48) | 1.476(8)  |
| C(m3)-C(23) | 1.508(5) | C(48)-O(6)  | 1.421(6)  |
| C(m4)-C(34) | 1.493(5) | O(6)-C(49)  | 1.403(7)  |
| C(1)-C(2)   | 1.396(7) | C(49)-C(50) | 1.494(8)  |
| C(1)-C(6)   | 1.393(7) | C(50)-N(10) | 1.467(7)  |
| C(2)-C(3)   | 1.396(7) | N(10)-C(51) | 1.465(7)  |
| C(2)-N(5)   | 1.415(6) | C(51)-C(52) | 1.505(8)  |
| C(3)-C(4)   | 1.386(8) | C(52)-O(7)  | 1.426(7)  |
| C(4)-C(5)   | 1.374(8) | O(7)-C(53)  | 1.417(7)  |
| C(5)-C(6)   | 1.383(7) | C(53)-C(54) | 1.482(9)  |
| C(7)-N(5)   | 1.351(7) | C(54)-O(8)  | 1.427(6)  |
| C(7)-O(1)   | 1.213(7) | O(8)-C(55)  | 1.418(7)  |
| C(7)-C(8)   | 1.527(8) | C(55)-C(56) | 1.505(8)  |
| C(8)-C(9)   | 1.522(9) | C(56)-N(9)  | 1.458(7)  |
| C(8)-C(10)  | 1.532(9) | N(9)-C(57)  | 1.471(7)  |
| C(8)-C(11)  | 1.525(9) | C(57)-C(58) | 1.507(7)  |
| C(12)-C(13) | 1.398(8) | C(58)-O(9)  | 1.421(6)  |
| C(12)-C(17) | 1.390(7) | O(9)-C(59)  | 1.424(6)  |
| C(13)-N(6)  | 1.400(7) | C(59)-C(60) | 1.479(8)  |
| C(13)-C(14) | 1.397(7) | C(60)-O(10) | 1.418(6)  |
| C(14)-C(15) | 1.369(9) | O(10)-C(61) | 1.422(6)  |
| C(15)-C(16) | 1.383(9) | C(61)-C(62) | 1.506(8)  |
| C(16)-C(17) | 1.386(7) | C(62)-N(10) | 1.459(7)  |
| C(18)-N(6)  | 1.346(7) | Cl-C(63)    | 1.757(9)  |
| C(18)-O(2)  | 1.207(6) | C(63)-C(64) | 1.371(11) |
| C(18)-C(19) | 1.527(8) | C(64)-C(65) | 1.403(14) |
| C(19)-C(20) | 1.535(8) | C(65)-C(66) | 1.320(28) |
| C(19)-C(21) | 1.506(8) | C(66)-C(67) | 1.46(3)   |
| C(19)-C(22) | 1.538(8) | C(67)-C(68) | 1.456(26) |
| C(23)-C(24) | 1.414(7) | C(68)-C(63) | 1.280(12) |

---

a Numbers in parentheses are the estimated standard deviation in the least significant digit(s).



Table S4. Bond Angles (deg) in [K(222)] [Fe(NO<sub>3</sub>)TpivotPP]·C<sub>6</sub>H<sub>5</sub>Cl

| angle           | value      | angle           | value    |
|-----------------|------------|-----------------|----------|
| N(1)FeN(2)      | 88.10(14)  | C(27)C(26)C(25) | 120.8(5) |
| N(1)FeN(3)      | 156.70(16) | C(26)C(27)C(28) | 119.2(5) |
| N(1)FeN(4)      | 88.78(15)  | C(23)C(28)C(27) | 121.6(5) |
| N(2)FeN(3)      | 85.86(14)  | C(29)N(7)C(24)  | 129.8(5) |
| N(2)FeN(4)      | 156.67(15) | O(3)C(29)N(7)   | 123.6(5) |
| N(3)FeN(4)      | 87.94(15)  | O(3)C(29)C(30)  | 120.6(5) |
| O(11)FeN(1)     | 104.81(16) | N(7)C(29)C(30)  | 115.8(5) |
| O(11)FeN(2)     | 87.74(15)  | C(31)C(30)C(29) | 107.5(5) |
| O(11)FeN(3)     | 98.29(15)  | C(32)C(30)C(29) | 107.3(4) |
| O(11)FeN(4)     | 105.41(15) | C(33)C(30)C(29) | 114.3(5) |
| FeN(1)C(a1)     | 127.8(3)   | C(31)C(30)C(32) | 109.5(5) |
| FeN(1)C(a2)     | 125.41(15) | C(31)C(30)C(33) | 109.5(5) |
| FeN(2)C(a3)     | 126.25(29) | C(32)C(30)C(33) | 108.7(5) |
| FeN(2)C(a4)     | 127.0(3)   | C(39)C(34)C(35) | 118.0(4) |
| FeN(3)C(a5)     | 127.0(3)   | C(39)C(34)C(m4) | 118.8(4) |
| FeN(3)C(a6)     | 127.0(3)   | C(m4)C(34)C(35) | 123.0(4) |
| FeN(4)C(a7)     | 127.7(4)   | C(36)C(35)C(34) | 120.8(4) |
| FeN(4)C(a8)     | 128.0(3)   | C(36)C(35)N(8)  | 123.0(4) |
| FeO(11)N(11)    | 121.2(3)   | C(34)C(35)N(8)  | 119.1(4) |
| O(11)N(11)O(12) | 118.8(4)   | C(37)C(36)C(35) | 120.3(5) |
| O(11)N(11)O(13) | 118.4(4)   | C(36)C(37)C(38) | 120.3(4) |
| O(12)N(11)O(13) | 122.7(5)   | C(39)C(38)C(37) | 119.2(5) |
| C(a1)N(1)C(a2)  | 105.6(4)   | C(34)C(39)C(38) | 122.1(5) |
| C(a3)N(2)C(a4)  | 105.6(4)   | C(40)N(8)C(35)  | 125.5(4) |
| C(a5)N(3)C(a6)  | 104.9(4)   | O(4)C(40)N(8)   | 120.7(5) |
| C(a7)N(4)C(a8)  | 105.0(4)   | O(4)C(40)C(41)  | 121.9(5) |
| N(1)C(a1)C(b1)  | 110.1(4)   | N(8)C(40)C(41)  | 117.3(5) |
| N(1)C(a1)C(m1)  | 125.3(4)   | C(42)C(41)C(40) | 107.4(5) |
| C(b1)C(a1)C(m1) | 124.6(4)   | C(43)C(41)C(40) | 109.4(5) |
| N(1)C(a2)C(b2)  | 110.4(4)   | C(44)C(41)C(40) | 110.5(5) |
| N(1)C(a2)C(m4)  | 124.4(4)   | C(42)C(41)C(43) | 108.7(5) |
| C(b2)C(a2)C(m4) | 125.1(4)   | C(42)C(41)C(44) | 110.8(6) |

Table S4. - continued

|                 |          |                 |          |
|-----------------|----------|-----------------|----------|
| N(2)C(a3)C(b3)  | 109.7(4) | C(43)C(41)C(44) | 109.9(5) |
| N(2)C(a3)C(m1)  | 126.3(4) | O(5)KO(6)       | 60.6(1)  |
| C(b3)C(a3)C(m1) | 124.0(5) | O(5)KO(7)       | 121.6(1) |
| N(2)C(a4)C(b4)  | 110.7(4) | O(5)KO(8)       | 93.6(1)  |
| N(2)C(a4)C(m2)  | 124.0(4) | O(5)KO(9)       | 99.3(1)  |
| C(b4)C(a4)C(m2) | 125.3(4) | O(5)KO(10)      | 136.1(1) |
| N(3)C(a5)C(b5)  | 111.2(4) | O(5)KN(9)       | 60.1(1)  |
| N(3)C(a5)C(m2)  | 124.4(4) | O(5)KN(10)      | 120.1(1) |
| C(b5)C(a5)C(m2) | 124.3(4) | O(6)KO(7)       | 95.3(1)  |
| N(3)C(a6)C(b6)  | 109.9(4) | O(6)KO(8)       | 129.3(1) |
| N(3)C(a6)C(m3)  | 126.1(4) | O(6)KO(9)       | 127.8(1) |
| C(b6)C(a6)C(m3) | 124.0(5) | O(6)KO(10)      | 99.8(1)  |
| N(4)C(a7)C(b7)  | 110.2(4) | O(6)KN(9)       | 120.5(1) |
| N(4)C(a7)C(m3)  | 124.7(4) | O(6)KN(10)      | 59.7(1)  |
| C(b7)C(a7)C(m3) | 125.0(5) | O(7)KO(8)       | 60.0(1)  |
| N(4)C(a8)C(b8)  | 111.7(4) | O(7)KO(9)       | 132.4(1) |
| N(4)C(a8)C(m4)  | 123.7(4) | O(7)KO(10)      | 97.5(1)  |
| C(b8)C(a8)C(m4) | 124.4(4) | O(7)KN(9)       | 118.9(1) |
| C(b2)C(b1)C(a1) | 106.9(4) | O(7)KN(10)      | 61.0(1)  |
| C(b1)C(b2)C(a2) | 106.7(4) | O(8)KO(9)       | 97.1(1)  |
| C(b4)C(b3)C(a3) | 106.8(4) | O(8)KO(10)      | 125.2(1) |
| C(b3)C(b4)C(a4) | 107.1(4) | O(8)KN(9)       | 59.0(1)  |
| C(b6)C(b5)C(a5) | 107.1(4) | O(8)KN(10)      | 120.9(1) |
| C(b5)C(b6)C(a6) | 106.8(4) | O(9)KO(10)      | 60.1(1)  |
| C(b8)C(b7)C(a7) | 105.7(4) | O(9)KN(9)       | 59.7(1)  |
| C(b7)C(b8)C(a8) | 107.3(4) | O(9)KN(10)      | 120.1(1) |
| C(a3)C(m1)C(a1) | 124.7(4) | O(10)KN(9)      | 119.6(1) |
| C(a3)C(m1)C(1)  | 118.2(4) | O(10)KN(10)     | 60.3(1)  |
| C(a1)C(m1)C(1)  | 117.1(4) | N(9)KN(10)      | 179.8(1) |
| C(a5)C(m2)C(a4) | 125.4(4) | N(9)C(45)C(46)  | 113.1(4) |
| C(a5)C(m2)C(12) | 117.4(4) | C(45)C(46)O(5)  | 107.8(4) |
| C(a4)C(m2)C(12) | 117.1(4) | C(46)O(5)C(47)  | 110.4(4) |
| C(a7)C(m3)C(a6) | 125.0(5) | KO(5)C(46)      | 112.7(3) |
| C(a7)C(m3)C(23) | 120.0(4) | KO(5)C(47)      | 112.6(3) |

Table S4. - continued

|                 |          |                 |          |
|-----------------|----------|-----------------|----------|
| C(a6)C(m3)C(23) | 115.0(4) | O(5)C(47)C(48)  | 110.0(4) |
| C(a8)C(m4)C(a2) | 126.3(4) | C(47)C(48)O(6)  | 109.4(4) |
| C(a8)C(m4)C(34) | 118.7(4) | C(48)O(6)C(49)  | 113.7(4) |
| C(a2)C(m4)C(34) | 114.8(3) | KO(6)C(48)      | 114.5(3) |
| C(6)C(1)C(2)    | 118.6(5) | KO(6)C(49)      | 149.2(4) |
| C(6)C(1)C(m1)   | 121.2(5) | O(6)C(49)C(50)  | 109.2(4) |
| C(2)C(1)C(m1)   | 120.2(4) | C(49)C(50)N(10) | 113.9(5) |
| C(3)C(2)C(1)    | 120.3(5) | KN(10)C(50)     | 109.1(3) |
| C(3)C(2)N(5)    | 121.7(5) | KN(10)C(51)     | 108.1(3) |
| C(1)C(2)N(5)    | 117.9(4) | KN(10)C(62)     | 109.4(3) |
| C(4)C(3)C(2)    | 119.4(5) | C(50)N(10)C(51) | 110.1(4) |
| C(5)C(4)C(3)    | 121.0(5) | C(50)N(10)C(62) | 109.6(5) |
| C(4)C(5)C(6)    | 119.4(5) | C(51)N(10)C(62) | 110.5(5) |
| C(1)C(6)C(5)    | 121.2(5) | N(10)C(51)C(52) | 113.2(4) |
| C(7)N(5)C(2)    | 128.4(5) | C(51)C(52)O(7)  | 108.8(4) |
| O(1)C(7)N(5)    | 121.7(6) | C(52)O(7)C(53)  | 111.3(4) |
| O(1)C(7)C(8)    | 122.6(5) | KO(7)C(52)      | 112.4(3) |
| N(5)C(7)C(8)    | 115.6(5) | KO(7)C(53)      | 111.4(3) |
| C(9)C(8)C(7)    | 114.7(5) | O(7)C(53)C(54)  | 109.6(5) |
| C(10)C(8)C(7)   | 107.0(5) | C(53)C(54)O(8)  | 108.9(5) |
| C(11)C(8)C(7)   | 107.5(6) | C(54)O(8)C(55)  | 112.7(4) |
| C(9)C(8)C(10)   | 108.1(6) | KO(8)C(54)      | 117.6(3) |
| C(9)C(8)C(11)   | 109.3(6) | KO(8)C(55)      | 119.6(3) |
| C(10)C(8)C(11)  | 110.1(5) | O(8)C(55)C(56)  | 108.3(5) |
| C(17)C(12)C(13) | 119.1(5) | C(55)C(56)N(9)  | 113.7(4) |
| C(17)C(12)C(m2) | 121.3(5) | C(56)N(9)C(57)  | 110.5(4) |
| C(13)C(12)C(m2) | 119.6(5) | C(56)N(9)C(45)  | 110.2(4) |
| C(14)C(13)C(12) | 119.3(6) | C(45)N(9)C(57)  | 109.3(4) |
| C(14)C(13)N(6)  | 123.7(6) | KN(9)C(56)      | 109.6(3) |
| C(12)C(13)N(6)  | 116.8(5) | KN(9)C(57)      | 109.0(3) |
| C(15)C(14)C(13) | 120.4(6) | KN(9)C(45)      | 108.2(3) |
| C(14)C(15)C(16) | 121.0(5) | C(58)C(57)N(9)  | 112.7(4) |
| C(17)C(16)C(15) | 118.8(5) | C(57)C(58)O(9)  | 108.8(4) |
| C(16)C(17)C(12) | 121.3(5) | C(58)O(9)C(59)  | 112.2(4) |

Table S4. - continued

|                 |          |                 |          |
|-----------------|----------|-----------------|----------|
| C(18)N(6)C(13)  | 130.4(5) | KO(9)C(58)      | 115.5(3) |
| O(2)C(18)N(6)   | 121.8(6) | KO(9)C(59)      | 113.2(3) |
| O(2)C(18)C(19)  | 122.7(6) | O(9)C(59)C(60)  | 109.7(4) |
| N(6)C(18)C(19)  | 115.5(5) | C(59)C(60)O(10) | 108.8(4) |
| C(20)C(19)C(18) | 110.8(5) | C(60)O(10)C(61) | 111.6(4) |
| C(21)C(19)C(18) | 108.8(5) | KO(10)C(60)     | 114.8(3) |
| C(22)C(19)C(18) | 108.5(5) | KO(10)C(61)     | 115.1(3) |
| C(20)C(19)C(21) | 109.5(5) | O(10)C(61)C(62) | 109.0(5) |
| C(20)C(19)C(22) | 109.5(5) | C(61)C(62)N(10) | 114.2(5) |
| C(21)C(19)C(22) | 109.3(5) | C(64)C(63)Cl    | 115.3(7) |
| C(28)C(23)C(24) | 118.9(5) | C(68)C(63)C(64) | 129(1)   |
| C(28)C(23)C(m3) | 120.5(5) | ClC(63)C(68)    | 115(1)   |
| C(24)C(23)C(m3) | 119.9(5) | C(63)C(64)C(65) | 120(1)   |
| C(23)C(24)C(25) | 118.8(5) | C(64)C(65)C(66) | 118(2)   |
| C(23)C(24)N(7)  | 116.6(5) | C(65)C(66)C(67) | 118(1)   |
| C(25)C(24)N(7)  | 124.5(5) | C(66)C(67)C(68) | 124(1)   |
| C(26)C(25)C(24) | 120.7(6) | C(67)C(68)C(63) | 110(2)   |

**Table S5. Anisotropic Thermal Parameters (in Square Angstroms)**

| Atom  | B(11)     | B(22)     | B(33)    | B(12)     | B(13)     | B(23)     |
|-------|-----------|-----------|----------|-----------|-----------|-----------|
| Fe    | 1.674(28) | 1.120(25) | 2.37(3)  | 0.024(23) | 0.247(22) | 0.265(24) |
| O(11) | 4.06(19)  | 2.42(17)  | 2.99(18) | 0.24(14)  | 1.60(15)  | 0.27(14)  |
| N(11) | 2.79(21)  | 2.81(21)  | 2.58(21) | 0.58(17)  | 0.51(17)  | 0.35(17)  |
| O(12) | 6.13(25)  | 2.32(18)  | 4.51(22) | 1.12(17)  | 2.76(20)  | 0.97(16)  |
| O(13) | 5.95(25)  | 3.82(21)  | 2.89(19) | 0.63(18)  | 2.24(18)  | 0.45(16)  |
| O(1)  | 4.25(24)  | 3.87(23)  | 9.6(4)   | -0.92(19) | 1.52(24)  | -3.88(24) |
| O(2)  | 5.05(24)  | 3.58(21)  | 4.40(23) | -0.06(18) | 1.53(19)  | 2.19(18)  |
| O(3)  | 1.58(17)  | 6.70(28)  | 4.29(22) | -0.14(17) | 0.07(15)  | -0.22(20) |
| O(4)  | 5.43(25)  | 2.67(19)  | 5.97(26) | 1.84(17)  | 3.29(21)  | 1.38(18)  |
| N(1)  | 1.65(16)  | 0.95(15)  | 2.04(17) | 0.20(12)  | -0.01(13) | 0.28(13)  |
| N(2)  | 1.73(17)  | 1.23(16)  | 1.90(17) | -0.44(13) | -0.05(14) | -0.15(13) |
| N(3)  | 1.52(16)  | 1.24(15)  | 2.47(18) | 0.21(13)  | 0.38(14)  | 0.36(14)  |
| N(4)  | 1.66(17)  | 1.19(16)  | 2.50(19) | -0.27(13) | 0.60(14)  | -0.09(14) |
| N(5)  | 2.89(21)  | 2.14(19)  | 2.30(19) | -0.23(16) | 0.27(16)  | -0.27(16) |
| N(6)  | 6.1(3)    | 1.56(19)  | 3.58(24) | 0.08(19)  | 1.96(23)  | 0.91(18)  |
| N(7)  | 1.47(17)  | 2.67(20)  | 2.75(21) | -0.34(15) | -0.08(15) | 0.23(16)  |
| N(8)  | 2.88(20)  | 0.98(15)  | 2.20(19) | 0.34(14)  | 0.50(16)  | 0.08(14)  |
| C(a1) | 2.21(21)  | 1.50(19)  | 1.21(18) | -0.05(16) | 0.47(16)  | 0.06(15)  |
| C(a2) | 2.37(22)  | 1.00(17)  | 2.16(21) | -0.21(16) | 0.59(17)  | -0.35(16) |
| C(a3) | 2.62(23)  | 1.46(19)  | 1.83(21) | 0.45(17)  | 0.62(18)  | 0.13(16)  |
| C(a4) | 2.46(23)  | 1.31(19)  | 2.09(21) | 0.59(16)  | 0.40(18)  | 0.39(16)  |
| C(a5) | 2.22(22)  | 1.32(19)  | 2.58(23) | 0.20(16)  | 0.66(18)  | 0.40(17)  |
| C(a6) | 2.44(23)  | 1.48(20)  | 2.71(23) | 0.07(17)  | 0.85(19)  | 0.19(18)  |
| C(a7) | 2.46(23)  | 1.59(20)  | 2.12(22) | 0.48(17)  | 0.82(18)  | 0.51(17)  |
| C(a8) | 1.72(20)  | 1.16(18)  | 1.70(20) | 0.76(15)  | 0.16(16)  | 0.39(15)  |
| C(b1) | 1.92(21)  | 1.47(19)  | 2.23(21) | -0.33(16) | 0.21(17)  | -0.09(16) |
| C(b2) | 1.76(20)  | 1.26(19)  | 2.03(21) | -0.07(15) | -0.10(16) | -0.26(16) |
| C(b3) | 2.28(22)  | 1.82(21)  | 2.82(24) | 0.58(18)  | 0.30(19)  | 0.35(18)  |
| C(b4) | 2.44(23)  | 1.34(20)  | 3.17(25) | 0.31(17)  | 0.18(19)  | 0.35(18)  |
| C(b5) | 1.66(21)  | 1.18(19)  | 3.80(27) | -0.68(16) | -0.48(19) | 0.36(18)  |
| C(b6) | 2.69(24)  | 1.66(21)  | 3.30(26) | -0.16(18) | 0.04(20)  | 0.39(19)  |
| C(b7) | 2.00(21)  | 1.68(20)  | 3.03(24) | 0.31(17)  | 0.45(18)  | 0.40(18)  |
| C(b8) | 2.22(21)  | 1.42(19)  | 2.89(23) | 0.57(17)  | 0.85(18)  | 0.40(18)  |
| C(m1) | 2.64(22)  | 1.33(18)  | 1.49(19) | 0.31(17)  | 0.44(16)  | 0.14(16)  |
| C(m2) | 1.98(21)  | 1.14(18)  | 3.05(24) | -0.14(16) | 0.50(18)  | 0.10(17)  |
| C(m3) | 2.64(22)  | 1.23(19)  | 2.07(21) | 0.26(16)  | 0.98(18)  | 0.31(16)  |
| C(m4) | 1.51(18)  | 1.17(17)  | 2.10(20) | 0.08(15)  | 0.47(15)  | -0.19(16) |
| C(1)  | 1.92(20)  | 0.74(17)  | 2.68(23) | 0.23(15)  | 0.09(17)  | 0.32(16)  |
| C(2)  | 2.37(23)  | 1.57(20)  | 2.60(24) | 0.11(17)  | 0.38(19)  | -0.06(18) |
| C(3)  | 2.67(25)  | 2.02(22)  | 2.75(25) | -0.21(19) | -0.40(20) | 0.00(19)  |
| C(4)  | 1.61(22)  | 1.86(22)  | 4.4(3)   | -0.01(17) | -0.28(21) | 0.29(21)  |
| C(5)  | 2.23(22)  | 1.41(20)  | 3.79(28) | 0.28(18)  | 0.81(20)  | 0.32(20)  |
| C(6)  | 2.70(23)  | 0.99(19)  | 2.74(23) | 0.17(17)  | 0.58(19)  | 0.21(17)  |
| C(7)  | 3.41(29)  | 1.89(24)  | 4.5(3)   | 0.23(21)  | -0.06(24) | -0.75(22) |
| C(8)  | 4.6(3)    | 1.91(23)  | 3.18(27) | 0.18(22)  | 0.78(24)  | -0.36(20) |
| C(9)  | 4.8(4)    | 3.01(29)  | 6.9(4)   | 0.02(26)  | 2.7(3)    | -1.07(29) |
| C(10) | 5.0(4)    | 3.7(3)    | 5.4(4)   | 1.41(27)  | 1.8(3)    | 0.35(28)  |
| C(11) | 6.9(5)    | 4.6(4)    | 3.9(3)   | -0.3(3)   | 1.2(3)    | -0.88(29) |
| C(12) | 1.82(22)  | 1.51(20)  | 3.12(25) | 0.03(16)  | -0.06(19) | 0.50(18)  |
| C(13) | 2.73(25)  | 1.76(23)  | 4.3(3)   | 0.01(19)  | 0.25(23)  | 0.82(21)  |
| C(14) | 3.43(28)  | 2.13(24)  | 4.6(3)   | -0.27(21) | 0.64(25)  | 1.34(23)  |
| C(15) | 3.18(26)  | 1.33(22)  | 5.3(3)   | -0.33(20) | 0.06(24)  | 1.44(23)  |
| C(16) | 2.20(23)  | 1.33(21)  | 4.9(3)   | 0.05(17)  | -0.35(22) | 0.17(20)  |
| C(17) | 2.10(22)  | 1.70(21)  | 3.60(27) | -0.33(17) | 0.15(20)  | 0.33(19)  |
| C(18) | 2.35(24)  | 3.03(26)  | 3.19(27) | -0.37(20) | 0.39(21)  | 1.50(22)  |

**Table S5. - Continued**

|       |          |          |          |           |           |           |
|-------|----------|----------|----------|-----------|-----------|-----------|
| C(19) | 2.76(25) | 3.23(26) | 2.44(25) | -0.25(21) | 0.07(20)  | 0.62(21)  |
| C(20) | 3.13(26) | 3.09(27) | 3.29(27) | 0.35(21)  | 1.12(22)  | 0.91(22)  |
| C(21) | 5.2(4)   | 4.7(3)   | 2.84(29) | -0.31(28) | 1.25(26)  | 0.33(25)  |
| C(22) | 4.5(3)   | 3.4(3)   | 5.1(4)   | -0.87(26) | 0.83(29)  | 0.22(27)  |
| C(23) | 2.14(22) | 1.00(18) | 2.85(24) | -0.38(16) | -0.29(19) | 0.48(17)  |
| C(24) | 2.04(22) | 1.64(20) | 2.90(25) | -0.38(17) | -0.11(19) | 0.48(19)  |
| C(25) | 2.30(24) | 2.44(24) | 4.0(3)   | -0.51(20) | -0.11(22) | 0.58(22)  |
| C(26) | 3.21(28) | 1.98(23) | 3.8(3)   | -0.72(20) | -1.12(23) | 0.33(22)  |
| C(27) | 4.1(3)   | 2.14(23) | 2.61(25) | -0.38(22) | -0.28(22) | 0.16(20)  |
| C(28) | 2.89(25) | 1.73(21) | 2.96(26) | -0.02(19) | 0.06(21)  | 0.04(19)  |
| C(29) | 2.11(24) | 2.36(23) | 3.69(28) | 0.12(20)  | 0.19(20)  | 0.64(22)  |
| C(30) | 2.40(23) | 1.89(22) | 3.44(27) | -0.42(18) | 0.52(20)  | 0.07(19)  |
| C(31) | 3.15(29) | 2.87(28) | 5.7(4)   | -0.04(22) | 0.66(26)  | -0.57(26) |
| C(32) | 3.8(3)   | 3.03(28) | 4.3(3)   | -1.04(23) | 0.84(26)  | 0.20(24)  |
| C(33) | 2.95(26) | 2.84(25) | 3.33(27) | -0.57(21) | 0.31(22)  | -0.20(22) |
| C(34) | 1.51(19) | 1.15(18) | 2.27(22) | -0.14(15) | -0.16(16) | -0.13(16) |
| C(35) | 1.49(20) | 1.46(19) | 1.98(21) | -0.03(15) | -0.14(17) | 0.01(16)  |
| C(36) | 2.47(22) | 0.94(18) | 2.24(22) | -0.22(16) | -0.24(18) | -0.31(16) |
| C(37) | 2.42(23) | 1.07(19) | 2.98(25) | -0.32(17) | -0.47(19) | 0.14(18)  |
| C(38) | 1.79(21) | 1.97(22) | 2.79(25) | -0.21(17) | -0.12(18) | 0.75(19)  |
| C(39) | 1.92(21) | 1.40(19) | 2.11(21) | 0.11(16)  | 0.18(17)  | 0.01(16)  |
| C(40) | 2.92(25) | 1.64(22) | 3.16(26) | 0.19(19)  | 0.65(21)  | -0.62(19) |
| C(41) | 3.64(28) | 1.83(22) | 3.44(28) | -0.16(20) | 1.52(23)  | -0.40(20) |
| C(42) | 6.8(5)   | 3.6(3)   | 7.1(5)   | 1.4(3)    | 4.3(4)    | 0.6(3)    |
| C(43) | 4.0(3)   | 3.21(28) | 4.0(3)   | -0.98(24) | 0.81(26)  | 0.02(24)  |
| C(44) | 4.8(3)   | 5.2(4)   | 2.72(28) | -1.81(29) | 1.01(25)  | -0.24(26) |
| K     | 2.05(4)  | 1.80(4)  | 2.38(5)  | 0.21(4)   | 0.10(4)   | -0.31(4)  |
| O(5)  | 2.74(16) | 1.97(15) | 2.22(15) | 0.52(12)  | 0.84(13)  | -0.45(12) |
| O(6)  | 2.35(16) | 2.42(16) | 3.43(18) | 0.08(13)  | 0.35(14)  | -0.35(14) |
| O(7)  | 2.78(17) | 2.29(16) | 3.09(18) | 0.18(13)  | 0.37(14)  | -1.02(14) |
| O(8)  | 2.45(17) | 4.06(20) | 2.21(16) | -0.36(14) | 0.34(13)  | -0.46(14) |
| O(9)  | 1.77(14) | 1.73(14) | 3.06(17) | 0.21(12)  | 0.08(12)  | -0.15(13) |
| O(10) | 2.43(16) | 2.53(16) | 2.51(16) | -0.44(13) | 0.10(13)  | 0.33(13)  |
| N(9)  | 2.32(18) | 1.79(18) | 2.38(19) | -0.01(14) | 0.38(15)  | -0.52(15) |
| N(10) | 2.77(21) | 2.45(20) | 3.15(22) | -0.21(16) | 0.29(17)  | 0.11(17)  |
| C(45) | 3.24(26) | 1.69(21) | 2.46(23) | -0.28(18) | 0.12(20)  | -0.23(18) |
| C(46) | 3.33(26) | 1.58(20) | 2.13(22) | 0.20(18)  | -0.06(19) | -0.20(17) |
| C(47) | 3.63(27) | 2.33(23) | 3.04(26) | 0.42(20)  | 1.50(22)  | -0.61(20) |
| C(48) | 2.97(26) | 2.79(25) | 2.86(25) | 1.17(20)  | 1.17(21)  | -0.05(20) |
| C(49) | 1.98(23) | 3.90(29) | 3.57(28) | 0.48(21)  | 0.54(21)  | -0.22(23) |
| C(50) | 2.28(25) | 4.1(3)   | 4.2(3)   | -0.86(22) | 0.79(22)  | -0.25(25) |
| C(51) | 2.46(25) | 2.46(24) | 4.1(3)   | -0.45(20) | -0.39(22) | -0.07(22) |
| C(52) | 3.50(28) | 2.07(23) | 3.34(27) | 0.13(20)  | -0.54(22) | -0.72(20) |
| C(53) | 3.15(27) | 4.3(3)   | 3.07(27) | 0.88(24)  | 0.19(22)  | -1.76(24) |
| C(54) | 3.10(27) | 5.0(3)   | 2.12(24) | 0.20(24)  | 0.44(20)  | -1.35(23) |
| C(55) | 2.89(24) | 3.53(27) | 2.56(24) | 0.23(21)  | 1.08(20)  | -0.27(21) |
| C(56) | 2.49(23) | 2.61(24) | 3.46(26) | 0.02(20)  | 0.68(20)  | -0.41(21) |
| C(57) | 2.05(22) | 2.22(22) | 3.13(25) | -0.37(18) | -0.25(19) | -0.47(20) |
| C(58) | 1.88(21) | 2.18(22) | 3.09(25) | -0.13(18) | -0.21(19) | -0.32(19) |
| C(59) | 2.59(24) | 1.80(21) | 2.92(25) | 0.19(18)  | -0.31(20) | 0.02(19)  |
| C(60) | 3.25(26) | 2.34(23) | 2.33(24) | -0.45(20) | -0.03(20) | 0.11(19)  |
| C(61) | 3.08(26) | 3.33(27) | 2.89(26) | -0.84(21) | 0.16(21)  | 0.68(22)  |
| C(62) | 3.41(29) | 2.80(26) | 4.3(3)   | -0.73(22) | 0.29(24)  | 1.02(23)  |
| Cl    | 6.09(13) | 5.03(12) | 23.3(4)  | 0.92(10)  | -2.51(18) | -3.70(17) |
| C(63) | 5.4(4)   | 2.9(3)   | 8.9(6)   | 0.2(3)    | 0.7(4)    | -0.2(3)   |
| C(64) | 4.7(4)   | 3.2(3)   | 7.4(5)   | 1.10(28)  | 0.4(4)    | 0.4(3)    |

**Table S5. - continued**

|       |          |        |          |          |            |         |
|-------|----------|--------|----------|----------|------------|---------|
| C(65) | 11.0(8)  | 5.2(5) | 10.9(8)  | 2.2(5)   | -5.9(8)    | 0.7(6)  |
| C(66) | 23.9(20) | 2.7(5) | 21.0(20) | 2.0(8)   | -17.05(18) | -1.4(8) |
| C(67) | 43.(3)   | 7.6(9) | 2.3(5)   | 11.5(14) | 1.2(10)    | -0.1(5) |
| C(68) | 23.7(15) | 7.9(7) | 10.8(8)  | 10.1(9)  | 12.6(10)   | 6.3(7)  |

- a. The estimated standard deviations of the least significant digits are given in parentheses. The B(ij)'s are related to the dimensionless beta(ij)'s employed during refinement as  $B(ij) = 4\beta(ij)/a(i)*a(j)^*$ .

**Table S6. Fractional Coordinates and Isotropic Thermal Parameters for the Fixed Atoms**

| atom   | x       | y       | z      | Biso |
|--------|---------|---------|--------|------|
| H(b1)  | 0.2098  | -0.0542 | 0.7352 | 2.35 |
| H(b2)  | 0.3096  | -0.1302 | 0.7774 | 2.14 |
| H(b3)  | 0.2060  | 0.1877  | 0.6848 | 2.77 |
| H(b4)  | 0.3043  | 0.2705  | 0.6929 | 2.72 |
| H(b5)  | 0.5898  | 0.2899  | 0.8046 | 2.37 |
| H(b6)  | 0.6794  | 0.2203  | 0.8707 | 3.05 |
| H(b7)  | 0.6829  | -0.0216 | 0.9268 | 2.74 |
| H(b8)  | 0.5938  | -0.1096 | 0.8950 | 2.52 |
| H(3)   | 0.0562  | 0.0236  | 0.5845 | 3.19 |
| H(4)   | -0.0306 | 0.0540  | 0.6449 | 3.07 |
| H(5)   | 0.0110  | 0.0942  | 0.7408 | 2.79 |
| H(6)   | 0.1405  | 0.1013  | 0.7784 | 2.56 |
| H(14)  | 0.4907  | 0.3832  | 0.6208 | 3.85 |
| H(15)  | 0.4663  | 0.4643  | 0.6816 | 3.23 |
| H(16)  | 0.4348  | 0.4451  | 0.7764 | 3.18 |
| H(17)  | 0.4232  | 0.3424  | 0.8073 | 3.01 |
| H(25)  | 0.8859  | 0.1246  | 0.9147 | 3.48 |
| H(26)  | 0.8860  | 0.1605  | 1.0111 | 3.59 |
| H(27)  | 0.7737  | 0.1646  | 1.0494 | 3.74 |
| H(28)  | 0.6612  | 0.1306  | 0.9911 | 3.22 |
| H(36)  | 0.4989  | -0.2833 | 0.7951 | 2.19 |
| H(37)  | 0.4290  | -0.3132 | 0.8678 | 2.56 |
| H(38)  | 0.3736  | -0.2382 | 0.9214 | 2.66 |
| H(39)  | 0.3901  | -0.1337 | 0.9022 | 2.33 |
| H(N5)  | 0.2482  | 0.0502  | 0.6161 | 3.11 |
| H(N6)  | 0.4870  | 0.2249  | 0.6627 | 3.68 |
| H(N7)  | 0.7187  | 0.0789  | 0.8141 | 2.81 |
| H(N8)  | 0.5149  | -0.1344 | 0.7412 | 2.35 |
| H(9a)  | 0.3114  | 0.0543  | 0.5331 | 5.53 |
| H(9b)  | 0.3785  | 0.0080  | 0.5414 | 5.53 |
| H(9c)  | 0.3473  | 0.0316  | 0.5969 | 5.53 |
| H(10a) | 0.3296  | -0.0776 | 0.6282 | 5.66 |
| H(10b) | 0.3618  | -0.1006 | 0.5730 | 5.66 |
| H(10c) | 0.2837  | -0.1239 | 0.5836 | 5.66 |
| H(11a) | 0.2219  | -0.0866 | 0.4787 | 6.31 |
| H(11b) | 0.3018  | -0.0669 | 0.4690 | 6.31 |
| H(11c) | 0.2362  | -0.0193 | 0.4595 | 6.31 |
| H(20a) | 0.5715  | 0.1588  | 0.6540 | 3.81 |
| H(20b) | 0.6346  | 0.1866  | 0.6234 | 3.81 |
| H(20c) | 0.6008  | 0.1222  | 0.6039 | 3.81 |
| H(21a) | 0.6032  | 0.2234  | 0.5164 | 5.28 |
| H(21b) | 0.5212  | 0.2183  | 0.4808 | 5.28 |
| H(21c) | 0.5693  | 0.1590  | 0.4967 | 5.28 |
| H(22a) | 0.4182  | 0.1732  | 0.5297 | 5.30 |
| H(22b) | 0.4370  | 0.1505  | 0.5957 | 5.30 |
| H(22c) | 0.4662  | 0.1139  | 0.5455 | 5.30 |
| H(31a) | 0.8217  | -0.0319 | 0.7445 | 4.88 |
| H(31b) | 0.8883  | 0.0078  | 0.7305 | 4.88 |
| H(31c) | 0.8218  | -0.0092 | 0.6794 | 4.88 |
| H(32a) | 0.8684  | 0.1214  | 0.7048 | 4.60 |
| H(32b) | 0.7894  | 0.1510  | 0.7028 | 4.60 |
| H(32c) | 0.8021  | 0.1041  | 0.6536 | 4.60 |
| H(33a) | 0.6808  | 0.0865  | 0.7250 | 3.90 |
| H(33b) | 0.6924  | 0.0168  | 0.7403 | 3.90 |
| H(33c) | 0.6934  | 0.0399  | 0.6756 | 3.90 |
| H(42a) | 0.6665  | -0.2582 | 0.6694 | 5.98 |
| H(42b) | 0.7229  | -0.2252 | 0.7194 | 5.98 |



**Table S6. - continued**

|        |        |         |         |      |
|--------|--------|---------|---------|------|
| H(43a) | 0.6972 | -0.1184 | 0.7518  | 4.70 |
| H(43b) | 0.6230 | -0.0845 | 0.7242  | 4.70 |
| H(43c) | 0.6856 | -0.0949 | 0.6860  | 4.70 |
| H(44a) | 0.5281 | -0.1375 | 0.6442  | 4.94 |
| H(44b) | 0.5442 | -0.2036 | 0.6229  | 4.94 |
| H(44c) | 0.5906 | -0.1479 | 0.6060  | 4.94 |
| H(45a) | 0.8377 | 0.0131  | 0.0062  | 3.04 |
| H(45b) | 0.9027 | 0.0240  | 0.0609  | 3.04 |
| H(46a) | 0.7942 | 0.0497  | 0.0925  | 2.94 |
| H(46b) | 0.8196 | -0.0133 | 0.1235  | 2.94 |
| H(47a) | 0.6657 | 0.0378  | 0.0856  | 3.38 |
| H(47b) | 0.6853 | -0.0194 | 0.1276  | 3.38 |
| H(48a) | 0.5927 | -0.0270 | 0.0154  | 3.32 |
| H(48b) | 0.5610 | -0.0228 | 0.0752  | 3.32 |
| H(49a) | 0.5309 | -0.1338 | 0.0018  | 3.87 |
| H(49b) | 0.5023 | -0.1166 | 0.0608  | 3.87 |
| H(50a) | 0.5058 | -0.2221 | 0.0538  | 4.20 |
| H(50b) | 0.5667 | -0.2011 | 0.1081  | 4.20 |
| H(51a) | 0.5520 | -0.2194 | -0.0418 | 3.71 |
| H(51b) | 0.5508 | -0.2886 | -0.0224 | 3.71 |
| H(52a) | 0.6218 | -0.2853 | -0.0956 | 3.73 |
| H(52b) | 0.6790 | -0.2951 | -0.0358 | 3.73 |
| H(53a) | 0.7106 | -0.2372 | -0.1437 | 3.94 |
| H(53b) | 0.7733 | -0.2480 | -0.0873 | 3.94 |
| H(54a) | 0.7325 | -0.1310 | -0.1338 | 3.87 |
| H(54b) | 0.8044 | -0.1660 | -0.1454 | 3.87 |
| H(55a) | 0.8213 | -0.0476 | -0.0739 | 3.61 |
| H(55b) | 0.8771 | -0.0867 | -0.1041 | 3.61 |
| H(56a) | 0.9456 | -0.1109 | -0.0096 | 3.59 |
| H(56b) | 0.9447 | -0.0395 | -0.0201 | 3.59 |
| H(57a) | 0.9903 | -0.0647 | 0.0877  | 3.05 |
| H(57b) | 0.9292 | -0.0611 | 0.1287  | 3.05 |
| H(58a) | 0.9932 | -0.1567 | 0.1371  | 2.99 |
| H(58b) | 0.9582 | -0.1699 | 0.0700  | 2.99 |
| H(59a) | 0.9335 | -0.2367 | 0.1776  | 3.17 |
| H(59b) | 0.9001 | -0.2607 | 0.1132  | 3.17 |
| H(60a) | 0.8095 | -0.2243 | 0.1948  | 3.31 |
| H(60b) | 0.8287 | -0.2935 | 0.1846  | 3.31 |
| H(61a) | 0.6732 | -0.2452 | 0.1559  | 3.89 |
| H(61b) | 0.7012 | -0.3136 | 0.1564  | 3.89 |
| H(62a) | 0.6562 | -0.3188 | 0.0529  | 4.29 |
| H(62b) | 0.5908 | -0.3074 | 0.0886  | 4.29 |
